# Supplementary material for: CO2electroreduction performance of a single transition metal atom supported on porphyrin-like graphene: a computational study
Source: Royal Society of Chemistry journal article supplement (doi:10.1039/c7cp04299j), 2017-01-01
Supplement: c7cp04299j1.pdf [file c7cp04299j1.pdf]

## Supporting Information

### **CO<sub>2</sub> Electroreduction Performance of Single Transition Metal Atom Supported on Porphyrin-Like Graphene: A Computational Study**

Zhongxu Wang,<sup>‡</sup> Jingxiang Zhao,<sup>†,‡,\*</sup> Qinghai Cai<sup>†,‡</sup>

<sup>†</sup>*Key Laboratory of Photonic and Electronic Bandgap Materials, Ministry of Education, Harbin Normal University, Harbin, 150025, China*

<sup>‡</sup>*Key Laboratory of Photochemical Biomaterials and Energy Storage Materials, and College of Chemistry and Chemical Engineering, Heilongjiang Province, Harbin Normal University, Harbin, 150025, China*

\* To whom correspondence should be addressed. Email: xjz\_hmily@163.com (JZ)

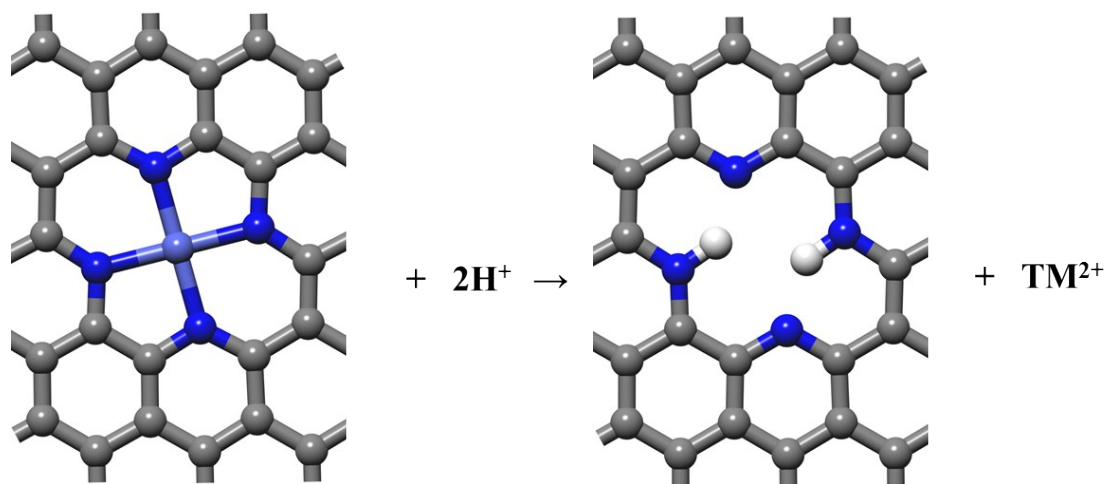

**Fig. S1:** Schematic diagrams of TM/H substitution reaction for single TM atom supported by porphyrin-like graphene.

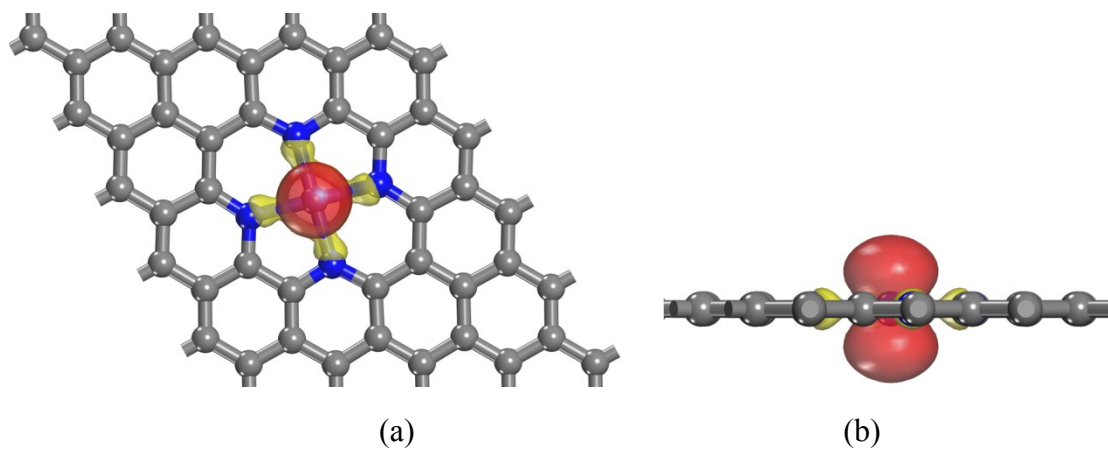

**Fig. S2.** The isosurface of spin-resolved density pictures of CoN<sub>4</sub>-embedded graphene:

(a) top and (b) side views. The isovalue is set to be  $0.01 \text{ e}\text{\AA}^{-2}$ .

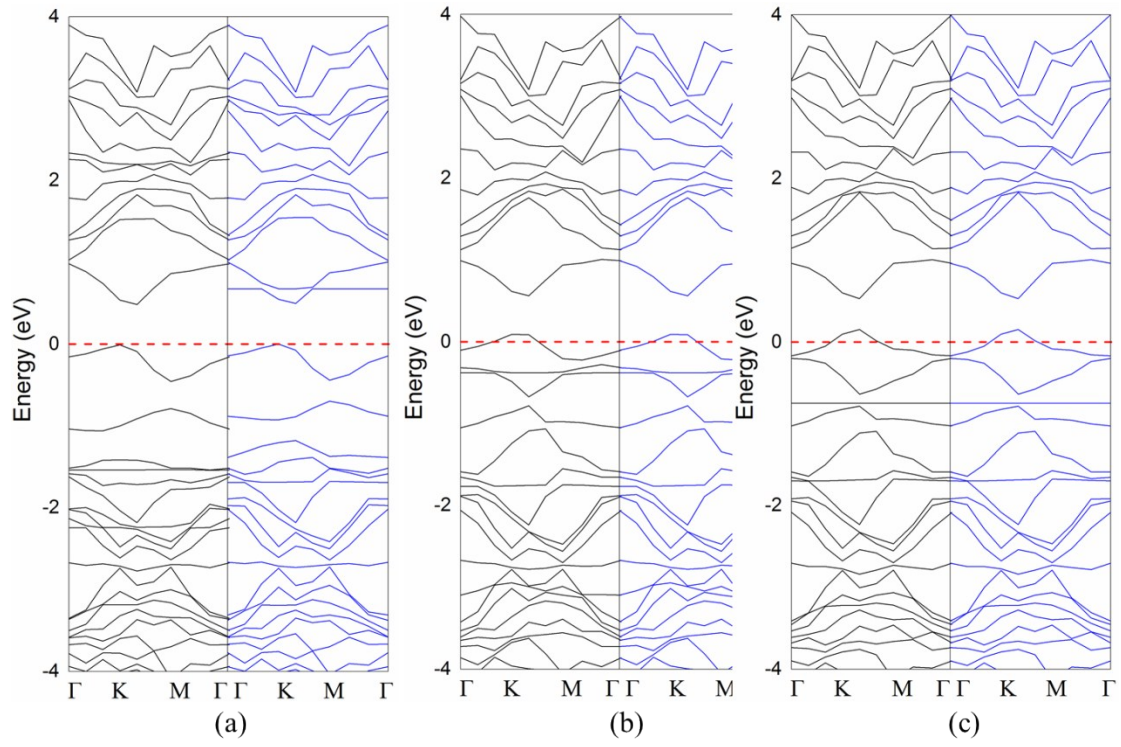

**Fig. S3:** The computed band structures of (a) CoN<sub>4</sub>, (b) RhN<sub>4</sub>, and (c) IrN<sub>4</sub> embedded graphenes. The Fermi level was set to zero as denoted by red dotted lines.

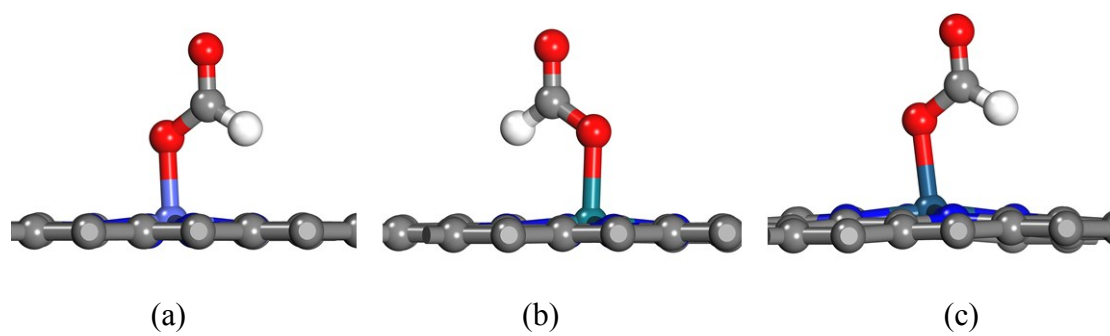

**Fig. S4.** Optimized structures of OCHO species on (a) Co, (b) Rh, and (c) Ir atoms supported by porphyrin-like graphene.
